# Supplementary material
Source: publisher figshare collection journal article supplement (https://karger.figshare.com/ndownloader/files/30457395)
Supplement: Supplementary file 1 [file 30457395]

Supplementary table 1

List of the genes screened in the study.

| 1 | ABCG2 | 31 | CDKN1B | 61 | DMP1 |
| --- | --- | --- | --- | --- | --- |
| 2 | ACE | 32 | CFB | 62 | EGF |
| 3 | ACTN4 | 33 | CFH | 63 | EHHADH |
| 4 | ADAMTS13 | 34 | CFHR1 | 64 | ENPP1 |
| 5 | AGTR1 | 35 | CFHR3 | 65 | EYA1 |
| 6 | AGXT | 36 | CFHR5 | 66 | FBN1 |
| 7 | ANLN | 37 | CFI | 67 | FGF23 |
| 8 | ANOS1 | 38 | CLCN5 | 68 | FGFR1 |
| 9 | APOA5 | 39 | CLCNKA | 69 | FKBP9 |
| 10 | APOE | 40 | CLCNKB | 70 | FN1 |
| 11 | APOL1 | 41 | CLDN16 | 71 | FXYD2 |
| 12 | APRT | 42 | CLDN19 | 72 | G6PC |
| 13 | AQP2 | 43 | CNNM2 | 73 | GATA3 |
| 14 | ARHGAP24 | 44 | COL4A3 | 74 | GCM2 |
| 15 | ARHGDIA | 45 | COL4A4 | 75 | GLA |
| 16 | ASS1 | 46 | COL4A5 | 76 | GNA11 |
| 17 | ATP6V0A1 | 47 | COL4A6 | 77 | GNAS |
| 18 | ATP6V0A4 | 48 | COL5A1 | 78 | GNAS-AS1 |
| 19 | ATP6V1B1 | 49 | COL5A2 | 79 | GPIHBP1 |
| 20 | ATP7B | 50 | COQ2 | 80 | GRHPR |
| 21 | AVPR2 | 51 | COQ6 | 81 | HNF1B |
| 22 | BSND | 52 | COQ8B | 82 | HNF4A |
| 23 | C3 | 53 | CRB2 | 83 | HOGA1 |
| 24 | CA2 | 54 | CTNS | 84 | HPRT1 |
| 25 | CACNA1D | 55 | CUBN | 85 | HSD11B2 |
| 26 | CACNA1H | 56 | CUL3 | 86 | INF2 |
| 27 | CASR | 57 | CYP11B1 | 87 | ITGA3 |
| 28 | CD2AP | 58 | CYP11B2 | 88 | ITGB4 |
| 29 | CD46 | 59 | CYP27B1 | 89 | KCNA1 |
| 30 | CDC73 | 60 | DGKE | 90 | KCNJ1 |

| 91 | KCNJ10 | 121 | PROKR2 | 151 | SQSTM1 |
| --- | --- | --- | --- | --- | --- |
| 92 | KCNJ5 | 122 | PTH | 152 | STK39 |
| 93 | KLHL2 | 123 | PTPRO | 153 | STX16 |
| 94 | KLHL3 | 124 | REN | 154 | THBD |
| 95 | LAMB2 | 125 | RET | 155 | TNXB |
| 96 | LMX1B | 126 | SALL1 | 156 | TRPC6 |
| 97 | LPL | 127 | SARS2 | 157 | TRPM6 |
| 98 | MAGED2 | 128 | SCNN1A | 158 | TSC1 |
| 99 | MEFV | 129 | SCNN1B | 159 | TSC2 |
| 100 | MEN1 | 130 | SCNN1G | 160 | UMOD |
| 101 | Mitochondria | 131 | SGK1 | 161 | VDR |
| 102 | MUC1 | 132 | SIX1 | 162 | VHL |
| 103 | MYH9 | 133 | SIX5 | 163 | WNK1 |
| 104 | MYO1E | 134 | SLC12A1 | 164 | WNK2 |
| 105 | NEDD4L | 135 | SLC12A3 | 165 | WNK3 |
| 106 | NLRP3 | 136 | SLC16A12 | 166 | WNK4 |
| 107 | NPHS1 | 137 | SLC17A5 | 167 | WT1 |
| 108 | NPHS2 | 138 | SLC22A12 | 168 | XDH |
| 109 | NR3C2 | 139 | SLC2A2 |  |  |
| 110 | OCRL | 140 | SLC2A9 |  |  |
| 111 | OXSR1 | 141 | SLC34A1 |  |  |
| 112 | PAX2 | 142 | SLC34A3 |  |  |
| 113 | PDSS2 | 143 | SLC3A1 |  |  |
| 114 | PHEX | 144 | SLC4A1 |  |  |
| 115 | PKD1 | 145 | SLC4A4 |  |  |
| 116 | PKD2 | 146 | SLC5A1 |  |  |
| 117 | PKHD1 | 147 | SLC5A2 |  |  |
| 118 | PLCE1 | 148 | SLC7A9 |  |  |
| 119 | PLG | 149 | SLC9A3 |  |  |
| 120 | PROK2 | 150 | SMARCAL1 |  |  |
